# Supplementary material for: Monitoring the Tropospheric Monitoring Instrument (TROPOMI) short-wave infrared (SWIR) module instrument stability using desert sites
Source: Copernicus journal article supplement (doi:10.5194/amt-14-6711-2021), 2021-10-20
Supplement: Supplementary file 1 [file amt-14-6711-2021-supplement.pdf]

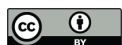

*Supplement of*

**Monitoring the Tropospheric Monitoring Instrument (TROPOMI)  
short-wave infrared (SWIR) module instrument stability  
using desert sites**

**Tim A. van Kempen et al.**

*Correspondence to:* Tim A. van Kempen (t.a.van.kempen@sron.nl)

The copyright of individual parts of the supplement might differ from the article licence.

## Supplement

Continuum radiances for the full sample (Table 1) as shown in Figure 2. Shown are all soundings over a period of more than 1,000 days, starting 28th of April 2018. The median radiance (red) and a linear fit (green) are shown with lines. Data has been corrected for the solar zenith angle at each individual overpass and assuming the surface is Lambertian. A yearly variation has been corrected using a fitted sine wave with a period of 365 days.

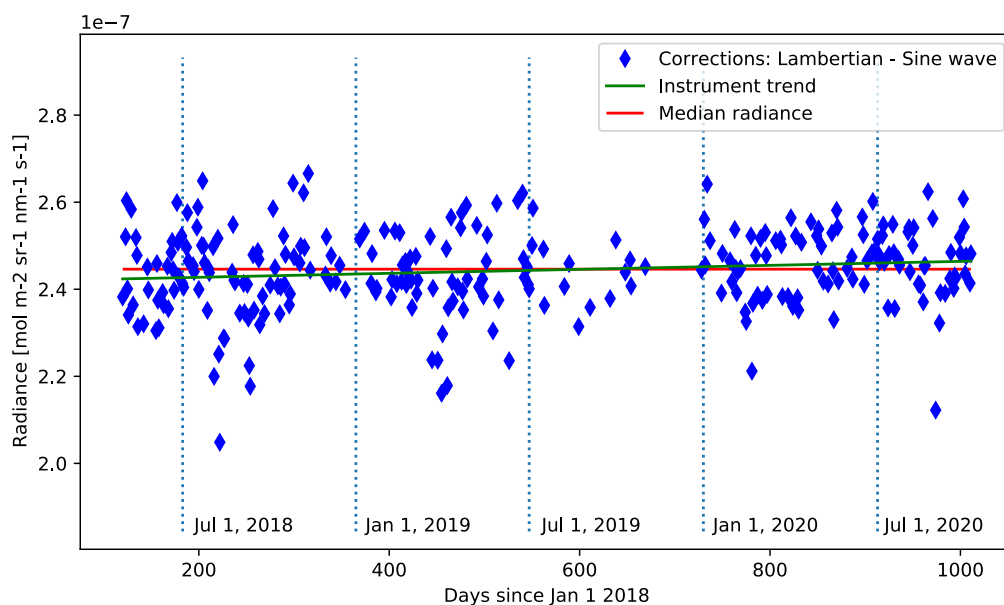

Fig. S1: Algeria1

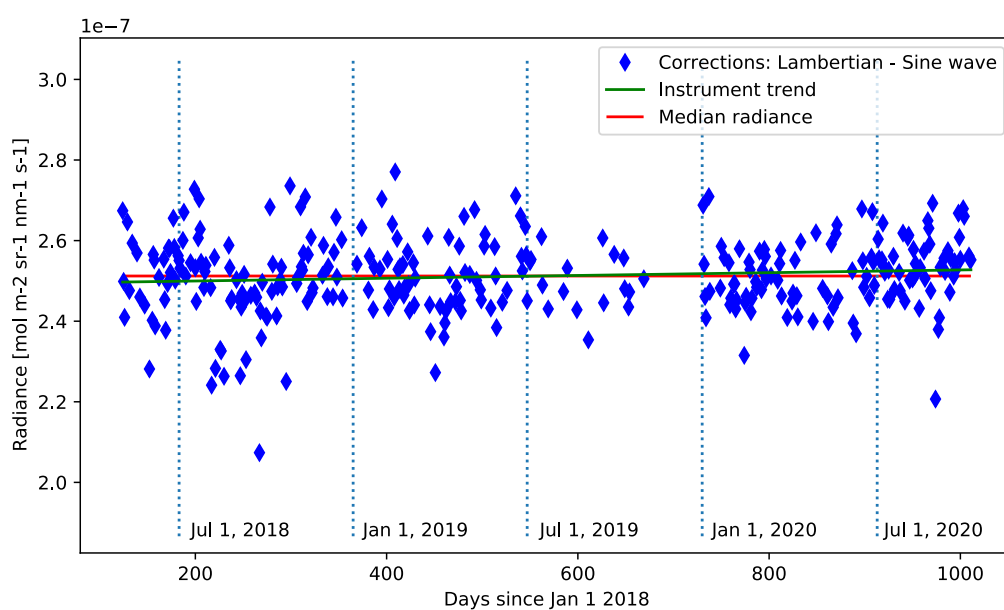

Fig. S2: Algeria2

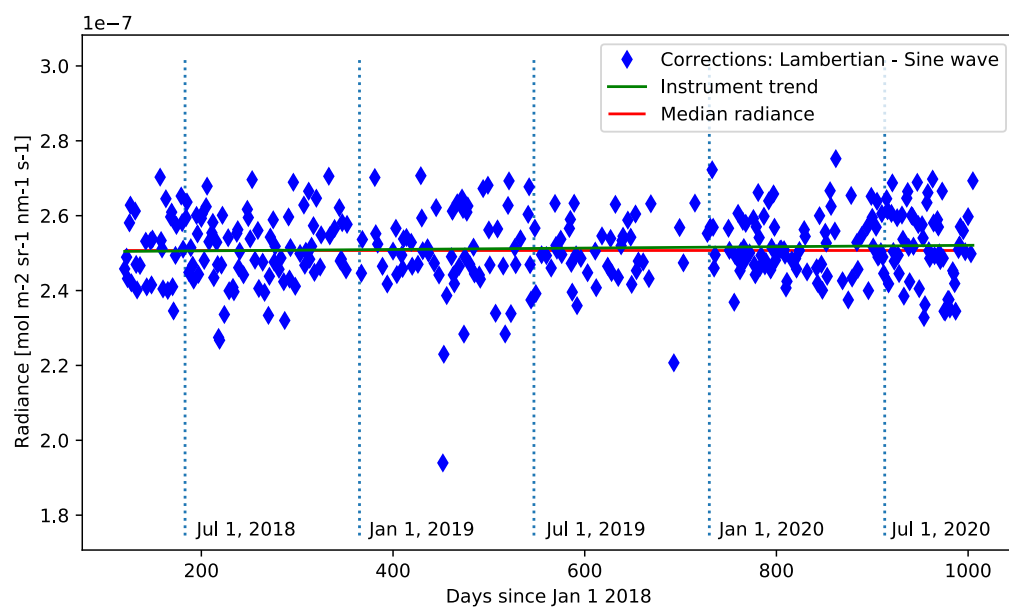

Fig. S3: Algeria3

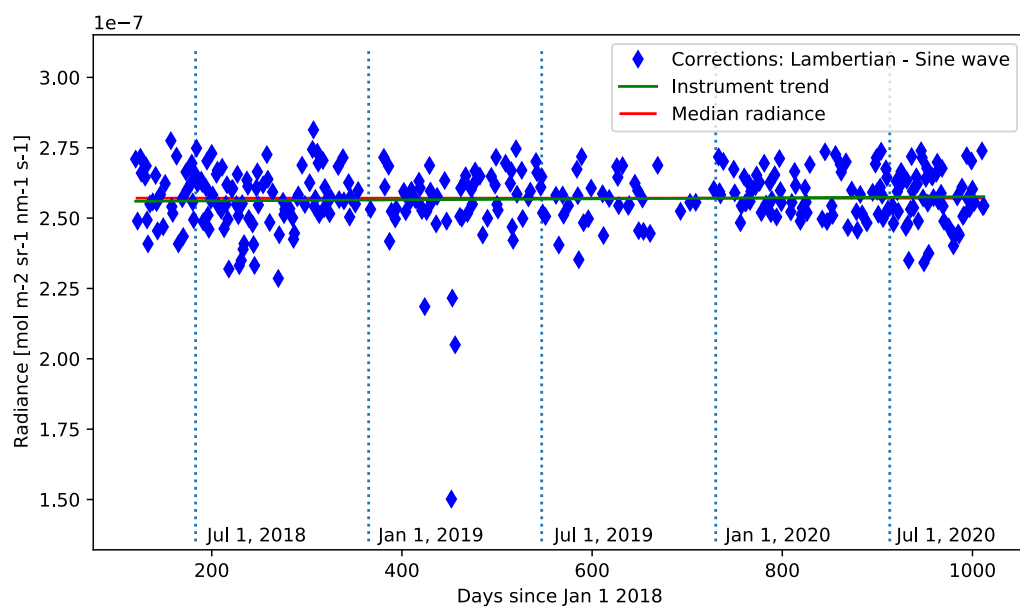

Fig. S4: Algeria4

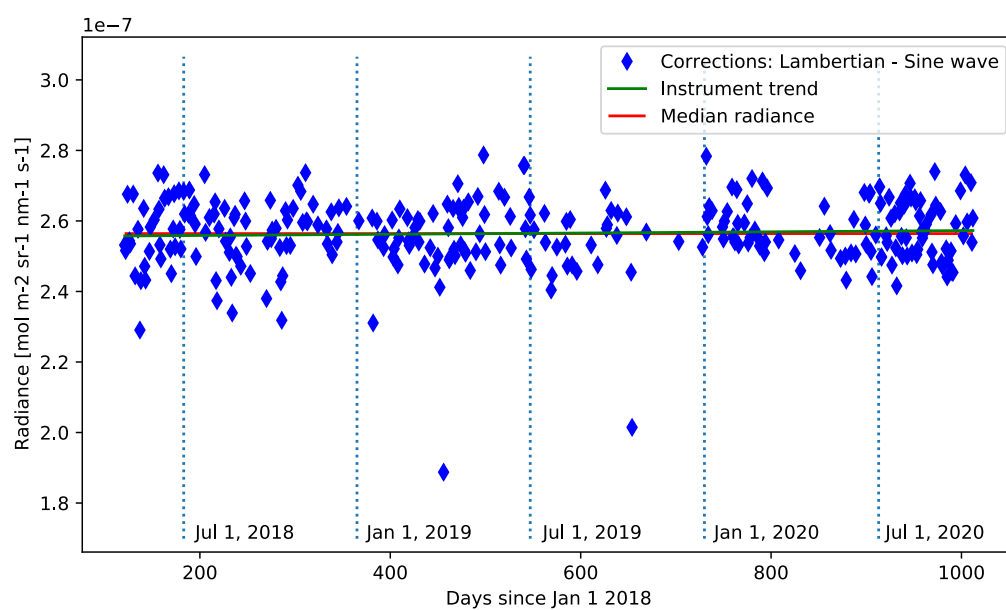

Fig. S5: Algeria5

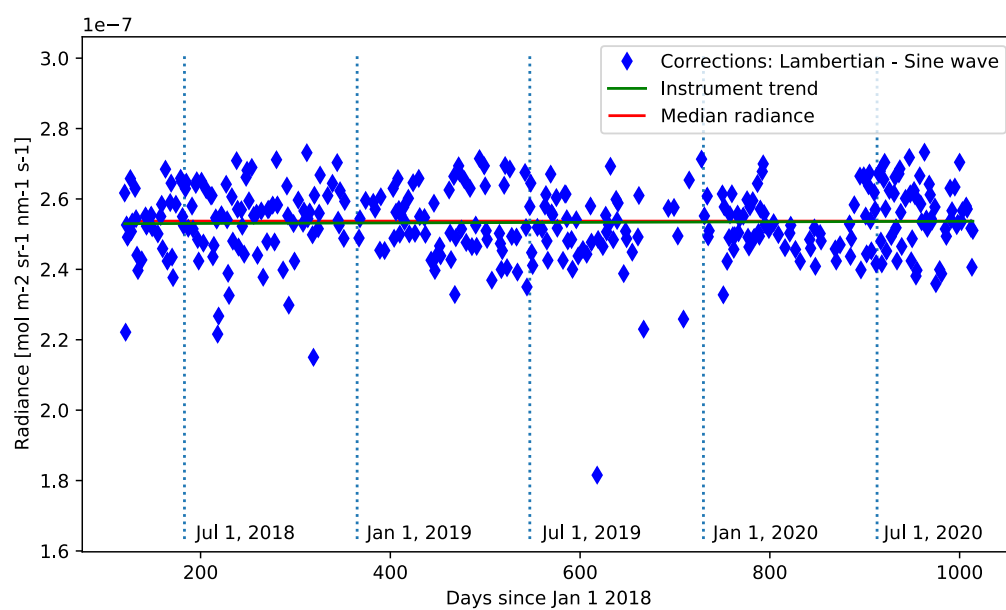

Fig. S6: AlgeriaPICSAND1

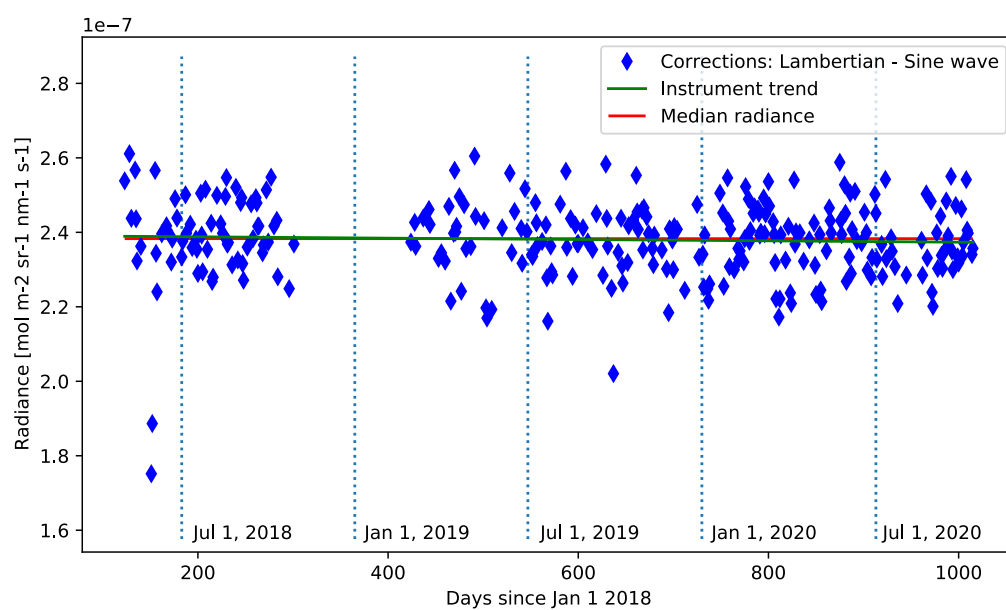

Fig. S7: Arabia1

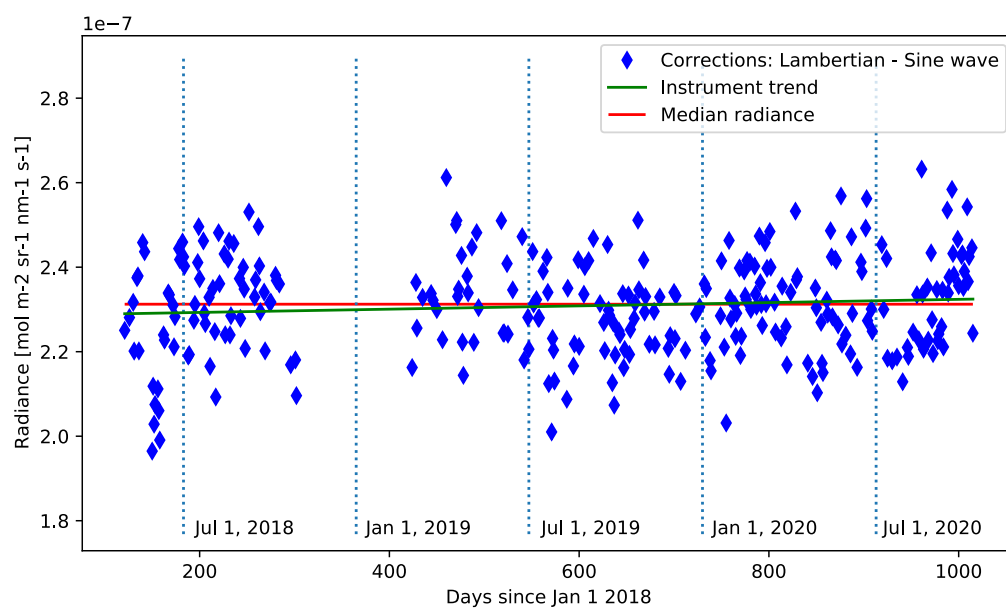

Fig. S8: Arabia2

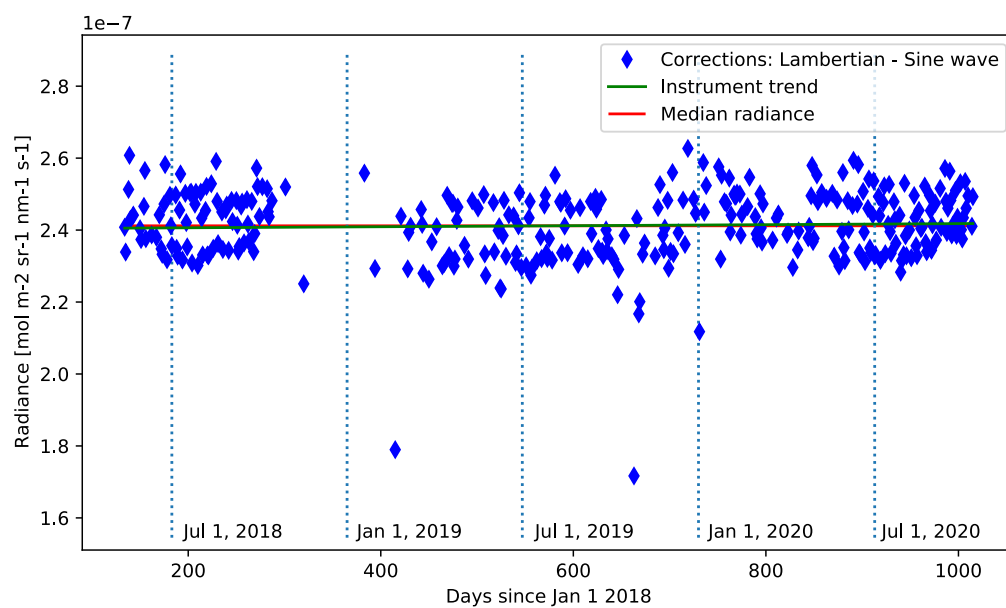

Fig. S9: Arabia3

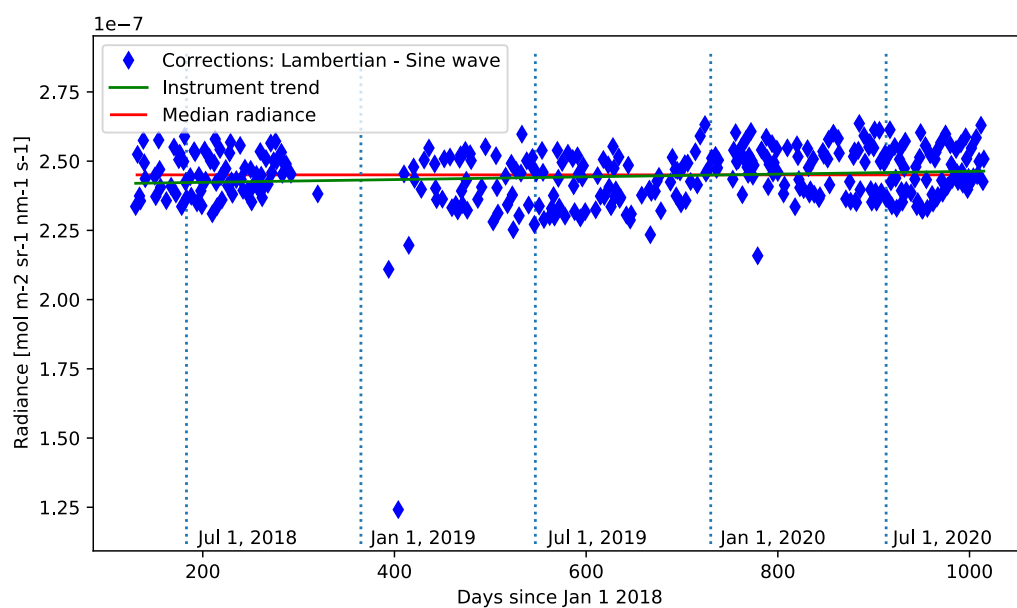

Fig. S10: ArabiaPICSAND1

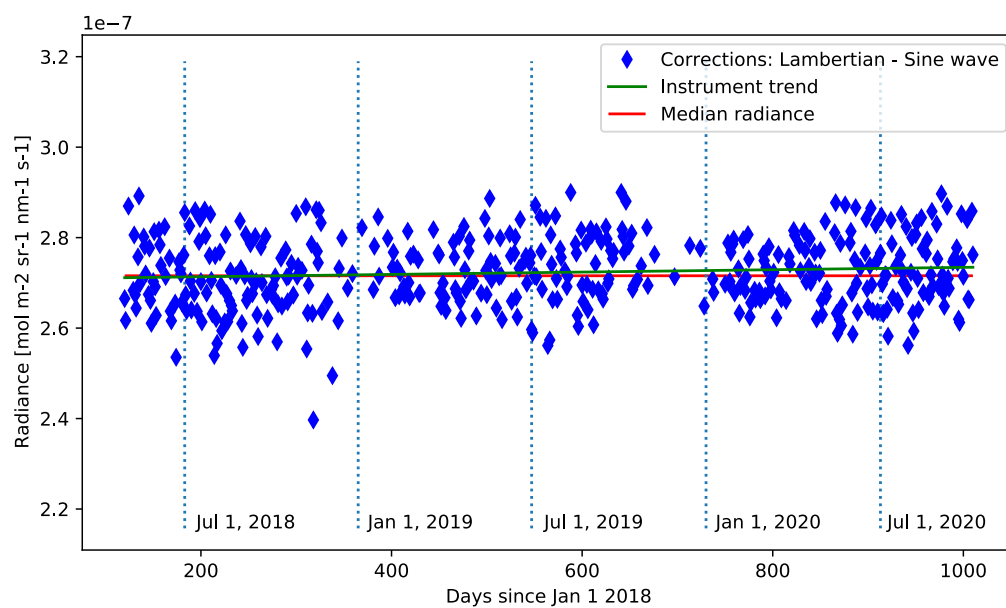

Fig. S11: Egyp1

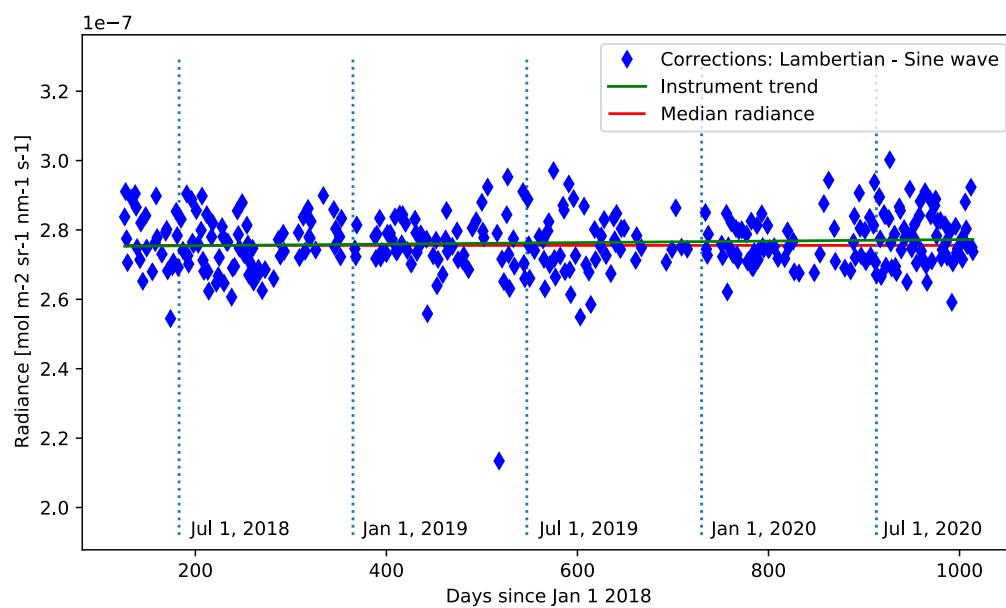

Fig. S12: Libya1

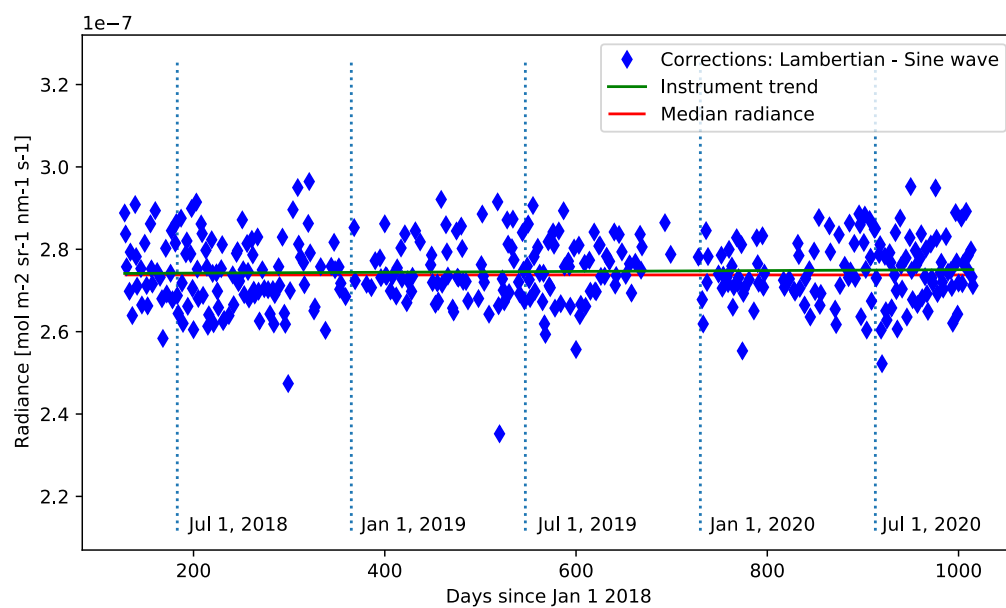

Fig. S13: Libya2

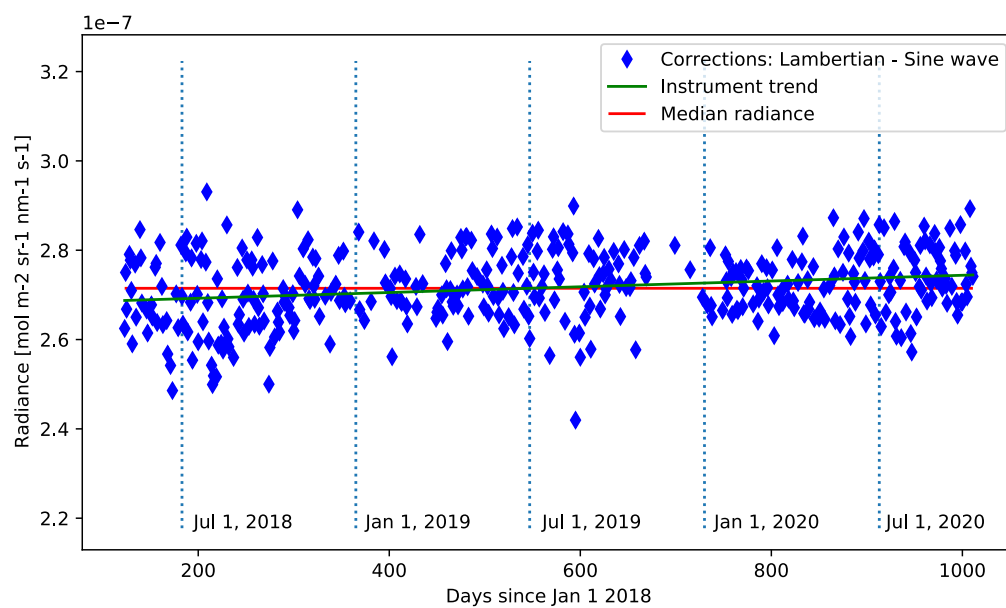

Fig. S14: Libya3



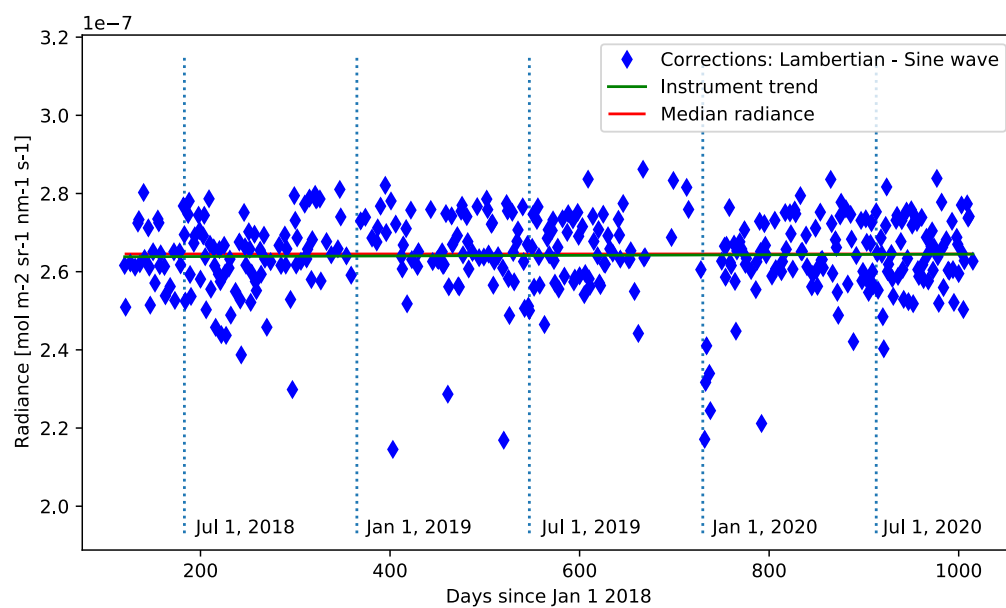

Fig. S15: Libya4

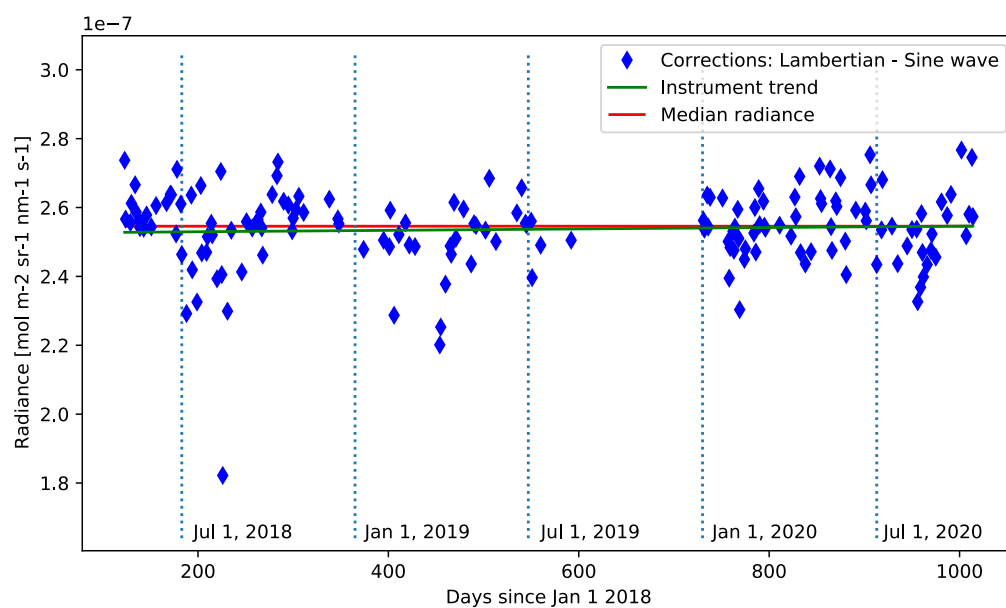

Fig. S16: Mali1

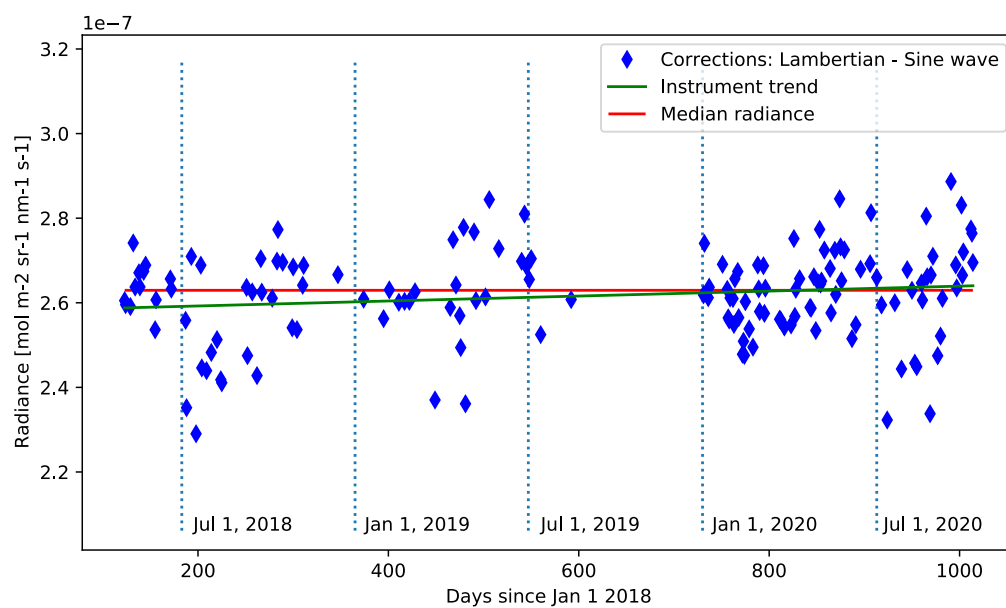

Fig. S17: Mauritania1

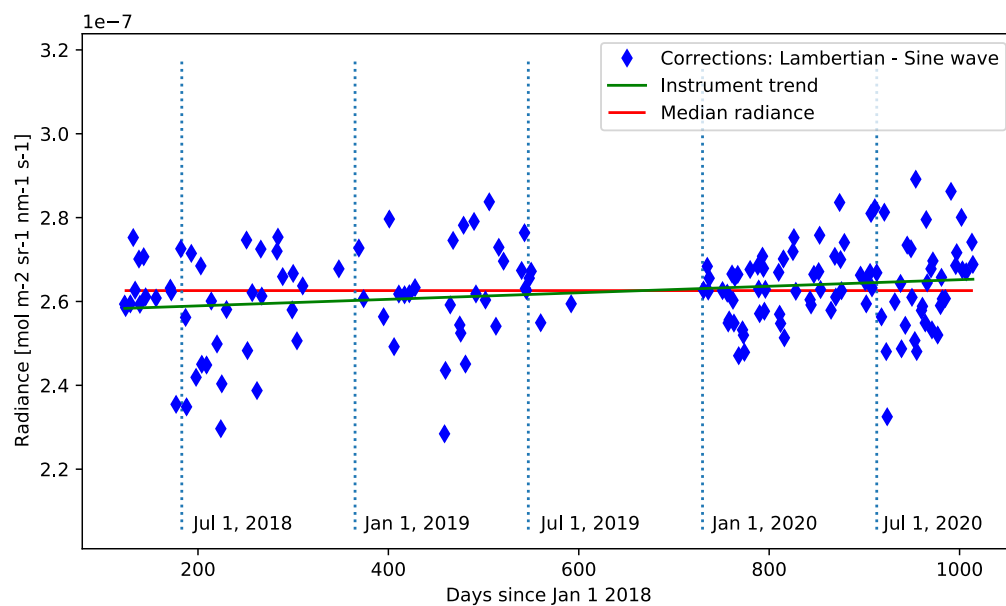

Fig. S18: Mauritania2

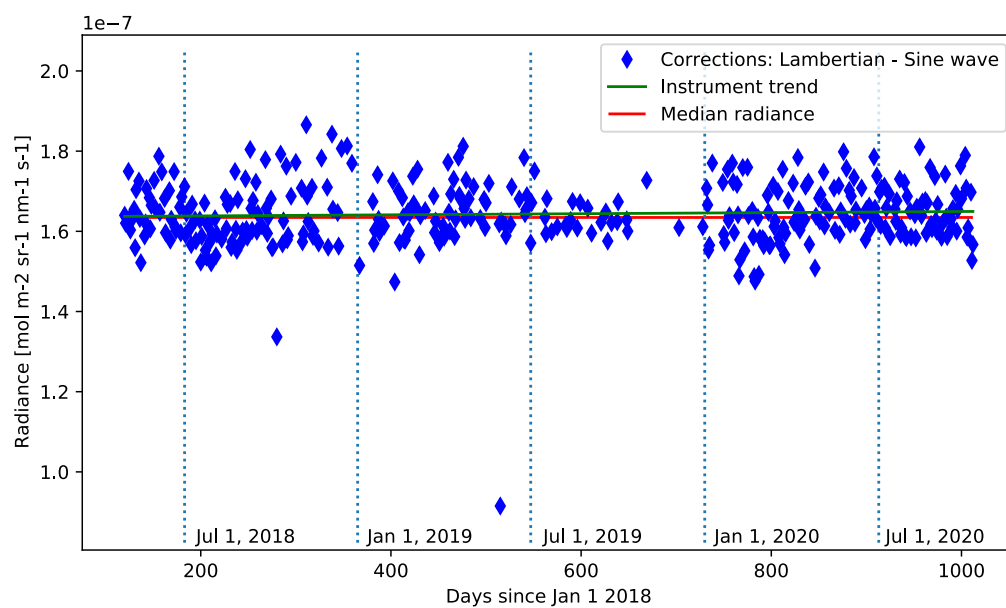

Fig. S19: NamibiaPICSAND1

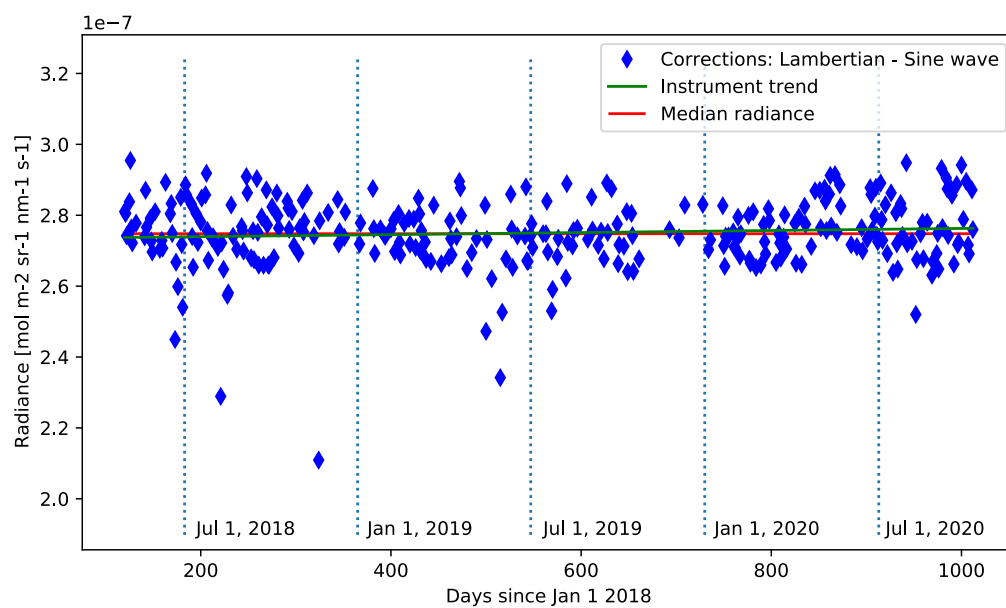

Fig. S20: Niger1

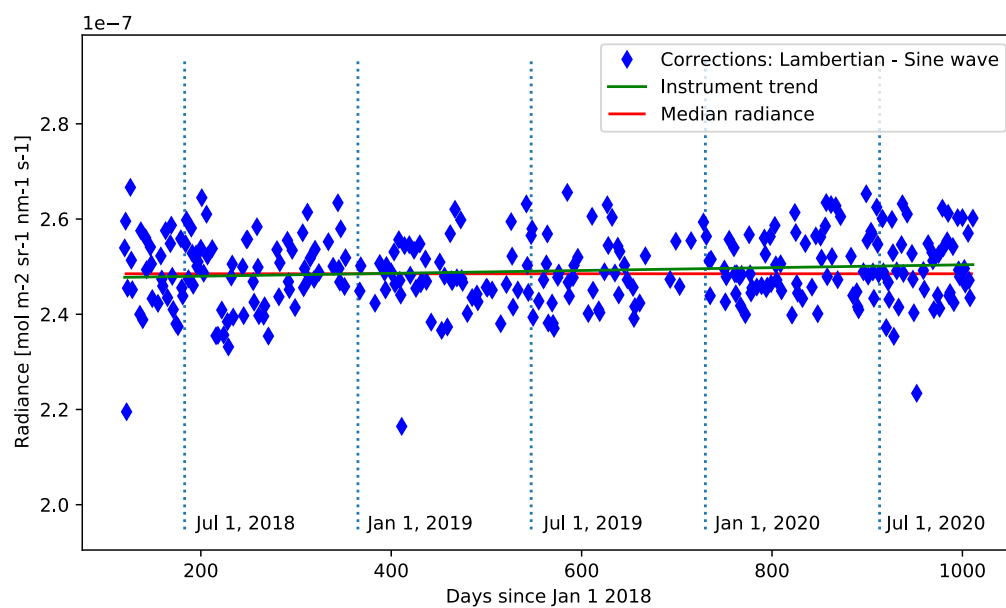

Fig. S21: Niger2

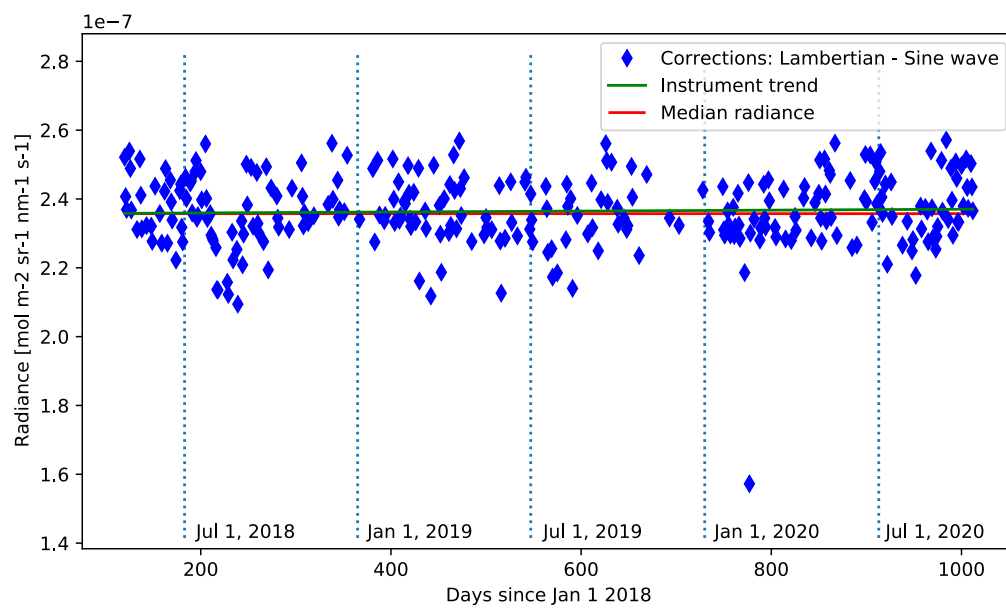

Fig. S22: Niger3

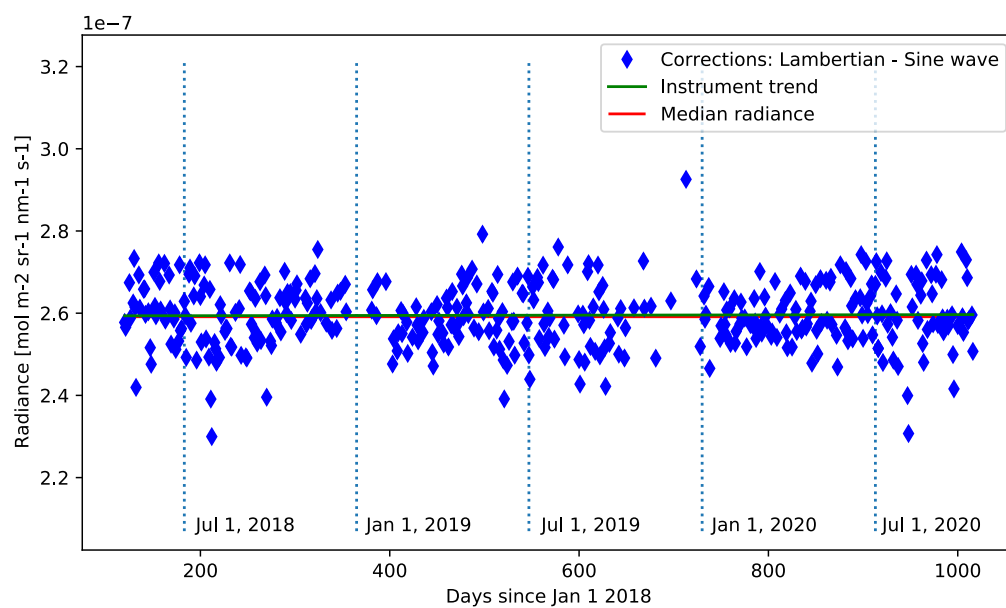

Fig. S23: Sudan1

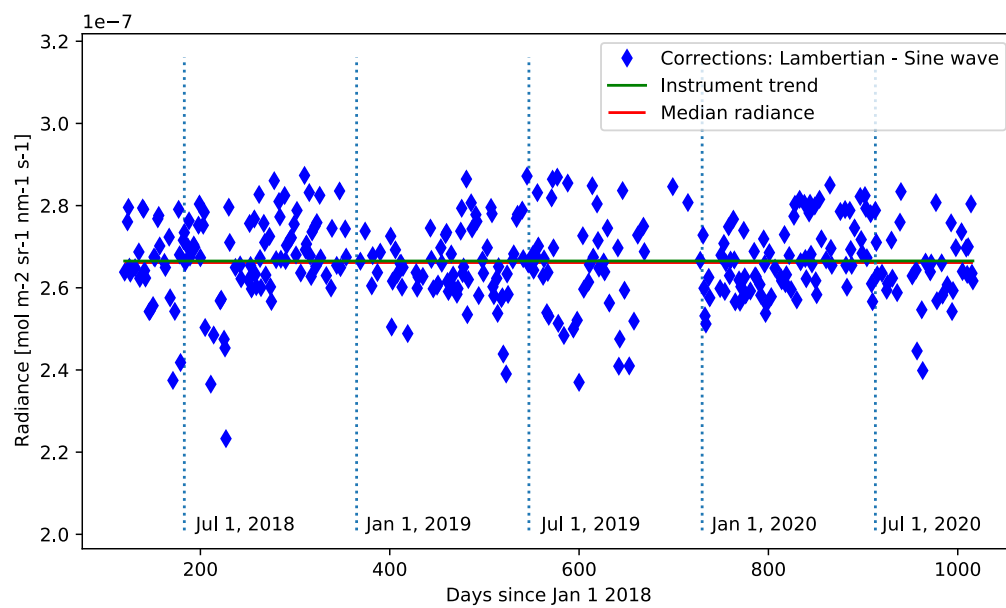

Fig. S24: SudanPICSAND1
